# Supplementary material for: Converting bulk MoSi2 alloy to a SiOx based anode material through controlled oxidation induced sublimation
Source: Royal Society of Chemistry journal article supplement (doi:10.1039/d3qm00265a), 2023-01-01
Supplement: d3qm00265a1.pdf [file d3qm00265a1.pdf]

## Electronic Supplementary Information

### Converting Bulk $\text{MoSi}_2$ Alloy to $\text{SiO}_x$ Based Anode Material through Controlled Oxidation Induced Sublimation

Dingyue Zhuang<sup>a</sup>, Yuanyuan Zhang<sup>a</sup>, Ruhan He<sup>a</sup>, Jingke Ren<sup>a</sup>, Qi Li<sup>b</sup>, Liqiang Mai<sup>a,c,d</sup>  
and Liang Zhou<sup>a,c,d\*</sup>

<sup>a</sup> State Key Laboratory of Advanced Technology for Materials Synthesis and Processing, Wuhan University of Technology, Wuhan 430070, P. R. China

<sup>b</sup> Foshan Xianhu Laboratory of the Advanced Energy Science and Technology Guangdong Laboratory, Foshan 528216, P. R. China

<sup>c</sup> Hubei Longzhong Laboratory, Wuhan University of Technology (Xiangyang Demonstration Zone), Xiangyang 441000, Hubei, P. R. China

<sup>d</sup> Hainan Institute, Wuhan University of Technology, Sanya 572000, P. R. China

E-mail: liangzhou@whut.edu.cn (Prof. L. Zhou);

### Experimental Section

**Characterization.** Scanning electron microscopy (SEM) images were obtained on a JEOL-7100F microscope. Transmission electron microscopy (TEM) images, high-resolution TEM (HRTEM) images, and Energy dispersive X-ray spectroscopy (EDX) elemental mappings were collected on a JEM-2100F microscope. X-ray diffraction

(XRD) patterns were recorded on a Bruker D8 Advance X-ray diffractometer with a non-monochromated Cu K $\alpha$  X-ray source ( $\lambda = 1.5418 \text{ \AA}$ ). X-ray photoelectron spectroscopy (XPS) spectra were obtained on a VG Multilab 2000 X-ray photoelectron instrument.

The Brunauer–Emmett–Teller (BET) surface areas were calculated from N<sub>2</sub> sorption results, which were measured on a Tristar-3020 instrument at 77 K. The thermogravimetry-differential scanning calorimetry (TG-DSC) was obtained on a TA SDT650 apparatus, and the samples were heated to 1000 °C in air with a heating rate of 10 °C min<sup>-1</sup>.

**Electrochemical Characterization.** The active material (70 wt%), acetylene black (20 wt%), and sodium alginate (10 wt%) were dispersed in water to form a slurry. The slurry was spread onto copper foil by the doctor blade method. The mass loading of the active material was 1.0–1.5 mg cm<sup>-2</sup>. The electrolyte was 1.0 M LiPF<sub>6</sub> in ethylene carbonate/dimethyl carbonate (1:1 by volume) containing 5 vol% fluoroethylene carbonate (FEC). A Whatman glass fiber membrane (GF/A) was used as the separator. Li foil was used as the reference electrode in half cells. Discharge/charge measurements were performed in a potential window of 0.01–3.0 V (vs. Li<sup>+</sup>/Li) using a Neware CT4008 battery tester. Cyclic voltammetry (CV) was performed with an Autolab PGSTAT 302N electrochemical workstation in the potential range of 0.01–3.0 V vs. Li<sup>+</sup>/Li at 0.1 mV s<sup>-1</sup>.

The SiMoO-800//LiFePO<sub>4</sub> full cells were assembled with cathode material/anode material ratio of about 4:1. 1.0 M LiPF<sub>6</sub> in ethylene carbon/dimethyl carbonate/ethyl methyl carbonate (1:1:1 by volume) was used as the electrolyte and GF/A was used as the separator. Before full cell assembly, the SiMoO-800 hybrid was pre-lithiated in half cells. The SiMoO-800//LiFePO<sub>4</sub> full cells were cycled at 0.5 C and 1 C (1 C = 170 mA g<sup>-1</sup>) in a voltage window of 2.2–3.8 V.

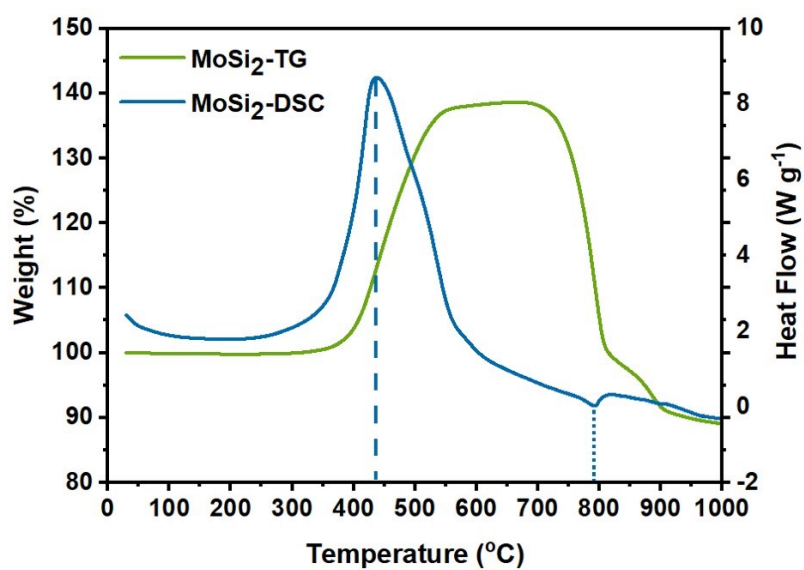

**Figure S1.** TG-DSC curves of MoSi<sub>2</sub> alloy.

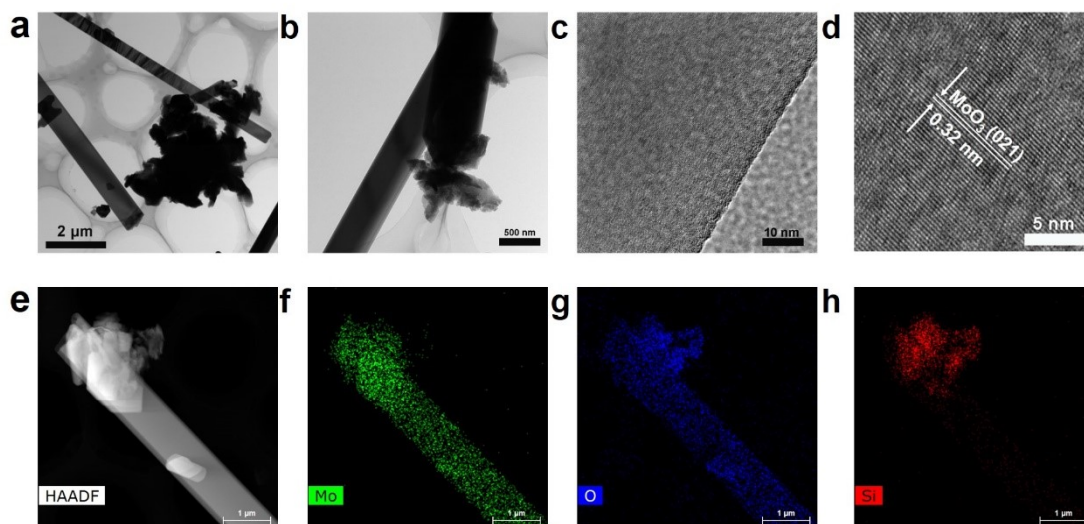

**Figure S2.** (a-b) TEM, (c-d) high-resolution TEM, (e) HAADF-STEM and (f-h) EDX elemental mappings of SiMoO-600.

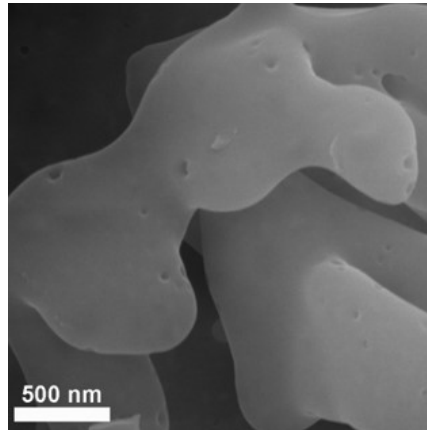

**Figure S3.** SEM images of SiMoO-800.

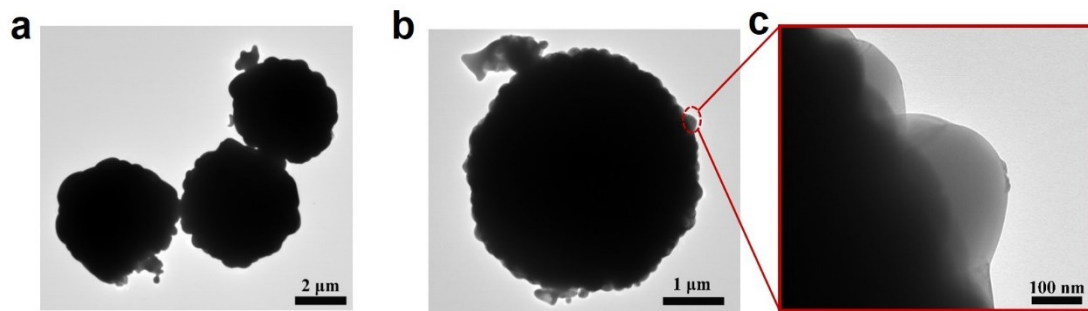

**Figure S4.** TEM images of SiMoO-1000.

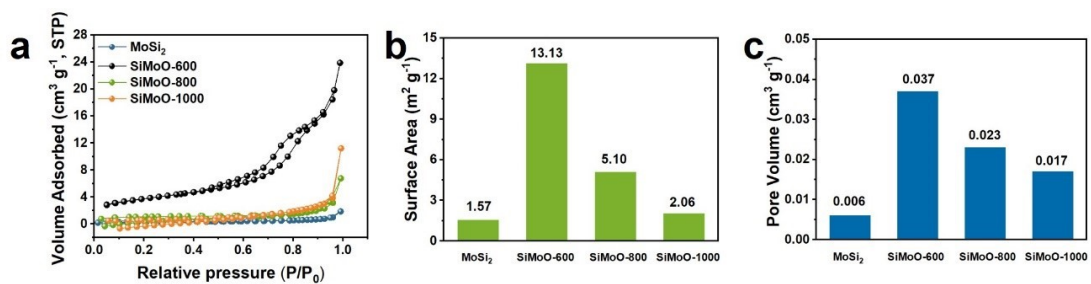

**Figure S5.** (a) N<sub>2</sub> adsorption/desorption isotherms, (b) BET surface area, and (c) pore volume of MoSi<sub>2</sub>, SiMoO-600, SiMoO-800, and SiMoO-1000.

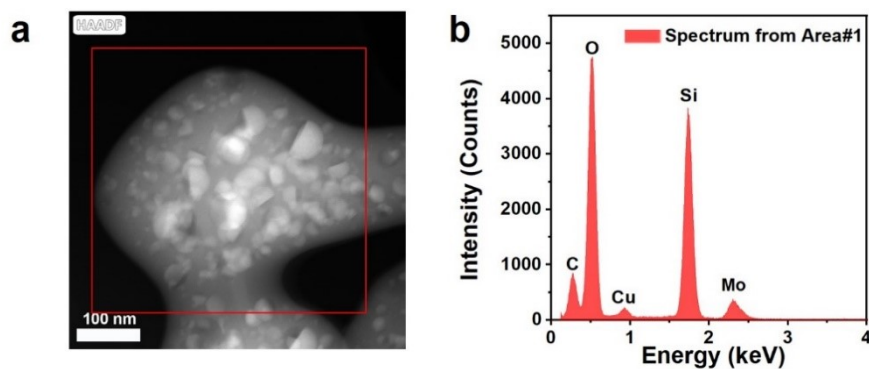

**Figure S6.** (a) HAADF-STEM images and (b) EDX spectrum.

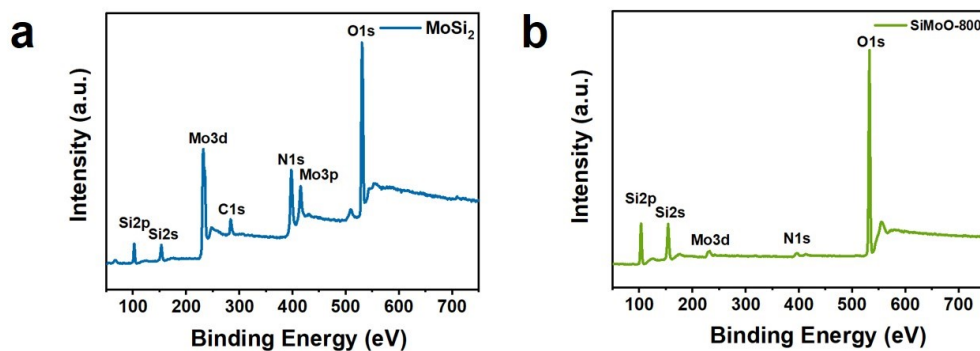

**Figure S7.** (a) XPS survey spectra of  $\text{MoSi}_2$  and (b)  $\text{SiMoO-800}$ .

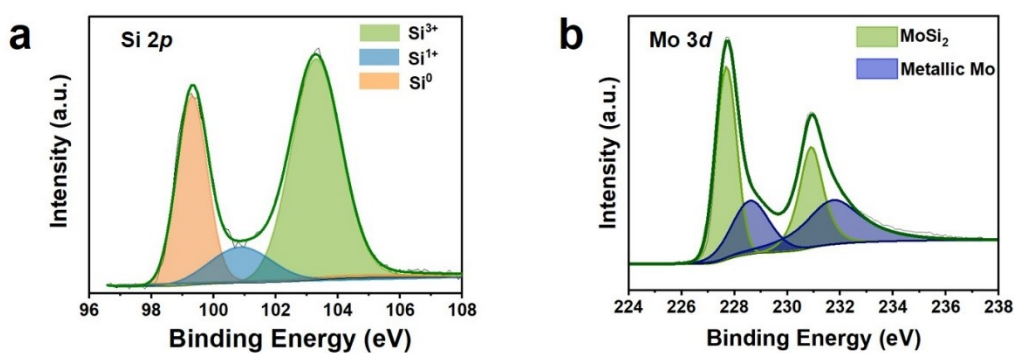

**Figure S8.** (a) High-resolution  $\text{Si}2p$  and (b)  $\text{Mo}3d$  XPS spectra of  $\text{MoSi}_2$ .

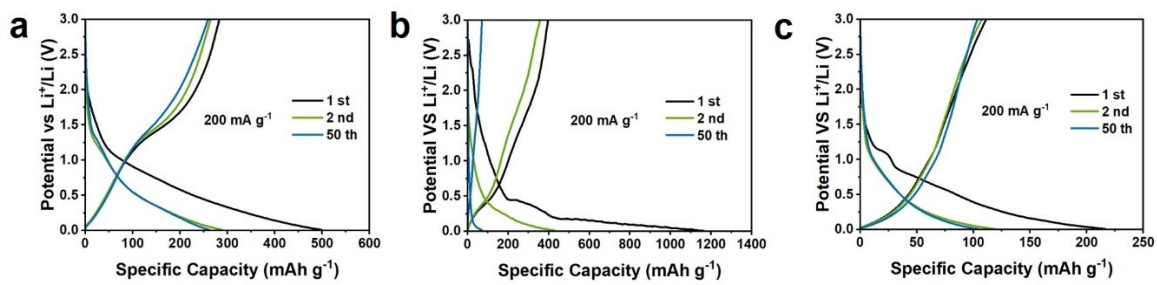

**Figure S9.** Representative GCD profiles of (a) $\text{MoSi}_2$ ; (b) $\text{SiMoO-600}$ ; (c) $\text{SiMoO-1000}$  at  $200 \text{ mA g}^{-1}$ .

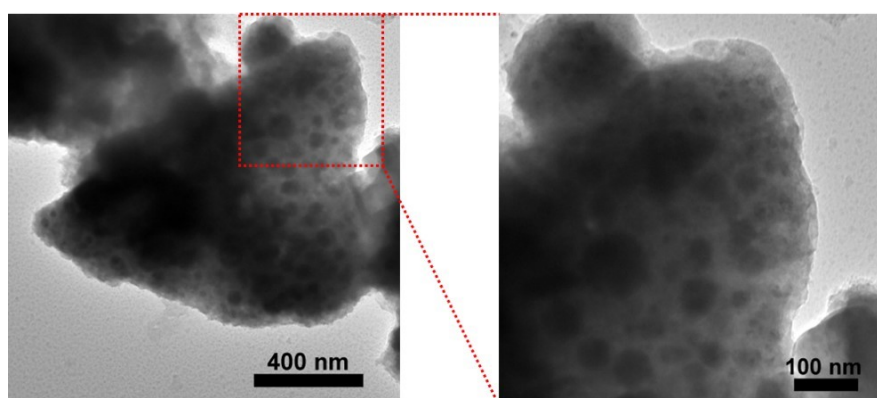

**Figure S10.** TEM images of  $\text{SiMoO-800}$  after 100 cycles at  $200 \text{ mA g}^{-1}$ .

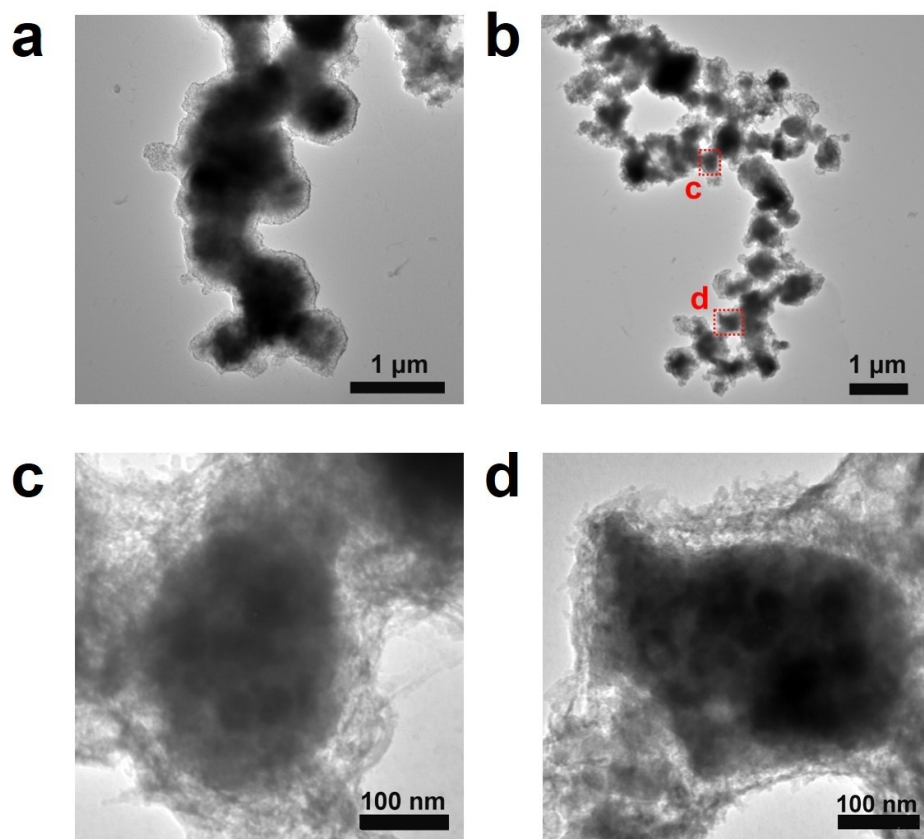

**Figure S11.** TEM images of SiMoO-800 after 100 cycles at 200 mA g<sup>-1</sup>.

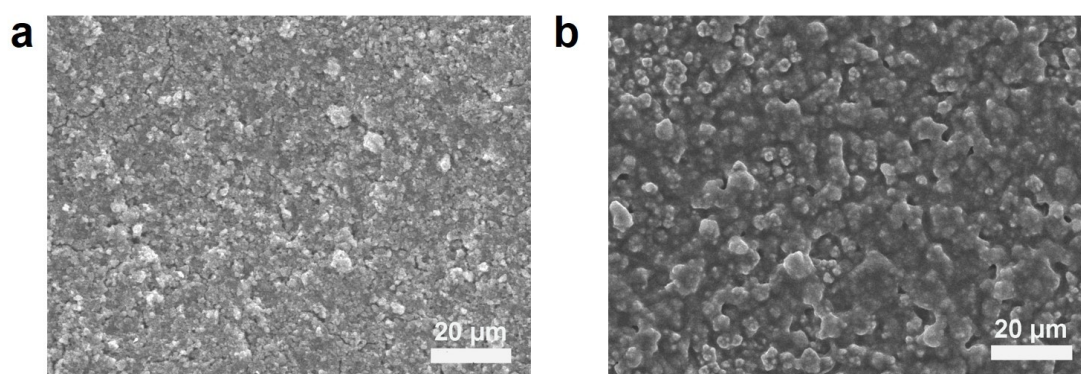

**Figure S12.** Top-view SEM images of SiMoO-800 (a) before and (b) after 100 cycles at 200 mA g<sup>-1</sup>.



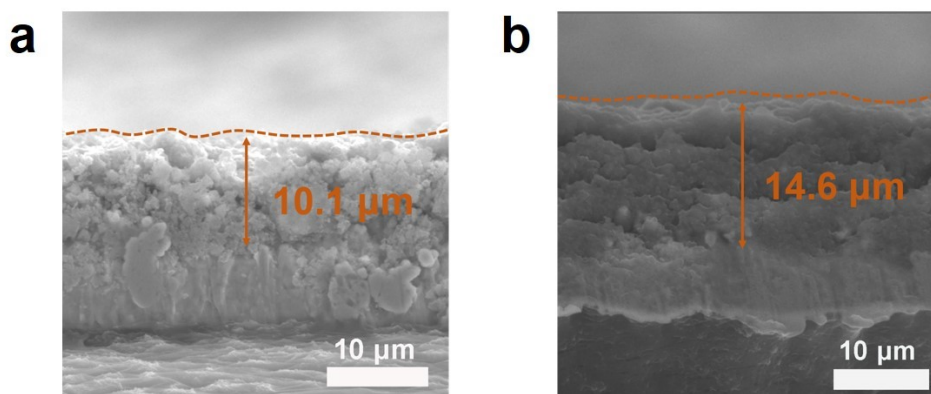

**Figure S13.** Cross-sectional SEM images of SiMoO-800 (a) before and (b) after 100 cycles at 200 mA g<sup>-1</sup>.

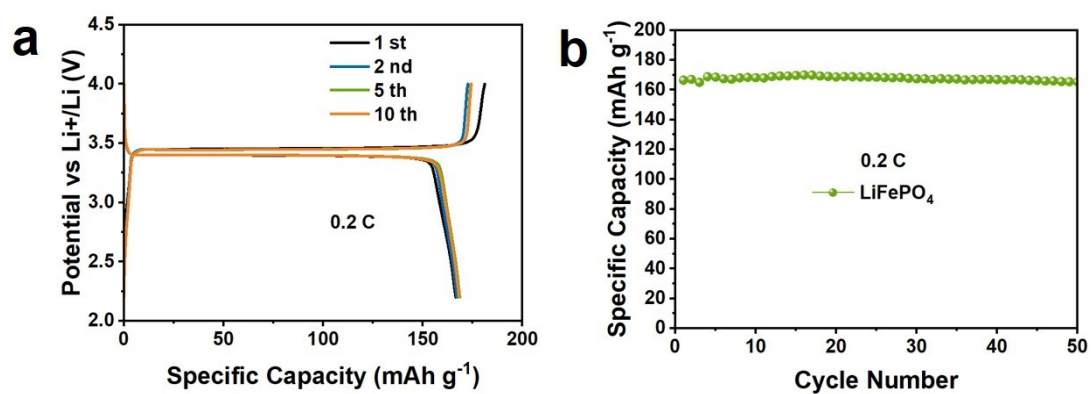

**Figure S14.** (a) Representative GCD profiles and (b) cycling performance of LiFePO<sub>4</sub> at 0.2 C (1 C = 170 mA g<sup>-1</sup>).
